# Supplementary material
Source: HighWire-hosted journal article supplement (https://www.cmajopen.ca/highwire/filestream/81282/field_highwire_adjunct_files/11/2018-0173-8-at.pdf)

**Appendix 8 (as supplied by the authors):** Mean cumulative incidences of overall ruptured repair by Local Health Integration Network prior to 2010. 1=Erie St. Clair; 2=South West; 3=Waterloo Wellington; 4=Hamilton Niagara Haldimand Brant; 5=Central West; 6=Mississauga Halton; 7=Toronto Central; 8=Central; 9=Central East; 10=South East; 11=Champlain; 12=North Simcoe Muskoka; 13=North West; 14=North East.

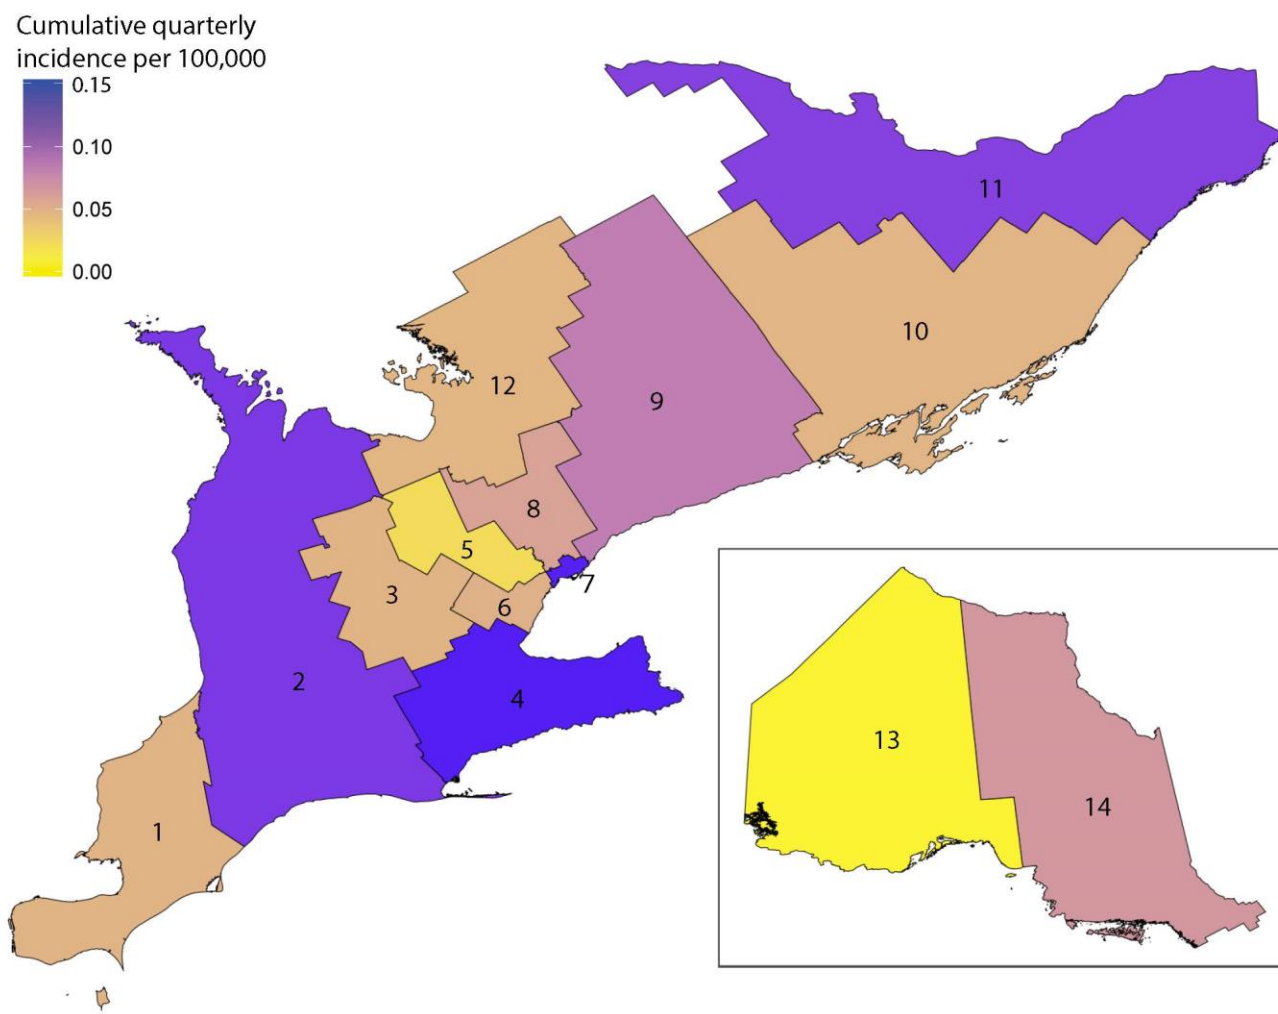

Supplement: 2018-0173-8-at.pdf [file 2018-0173-8-at.pdf]
